# Supplementary material for: Biotransformation of the Fluoroquinolone, Levofloxacin, by the White-Rot Fungus Coriolopsis gallica
Source: MDPI journal article supplement (doi:10.3390/jof8090965), 2022-09-15
Supplement: s1 [file s1]

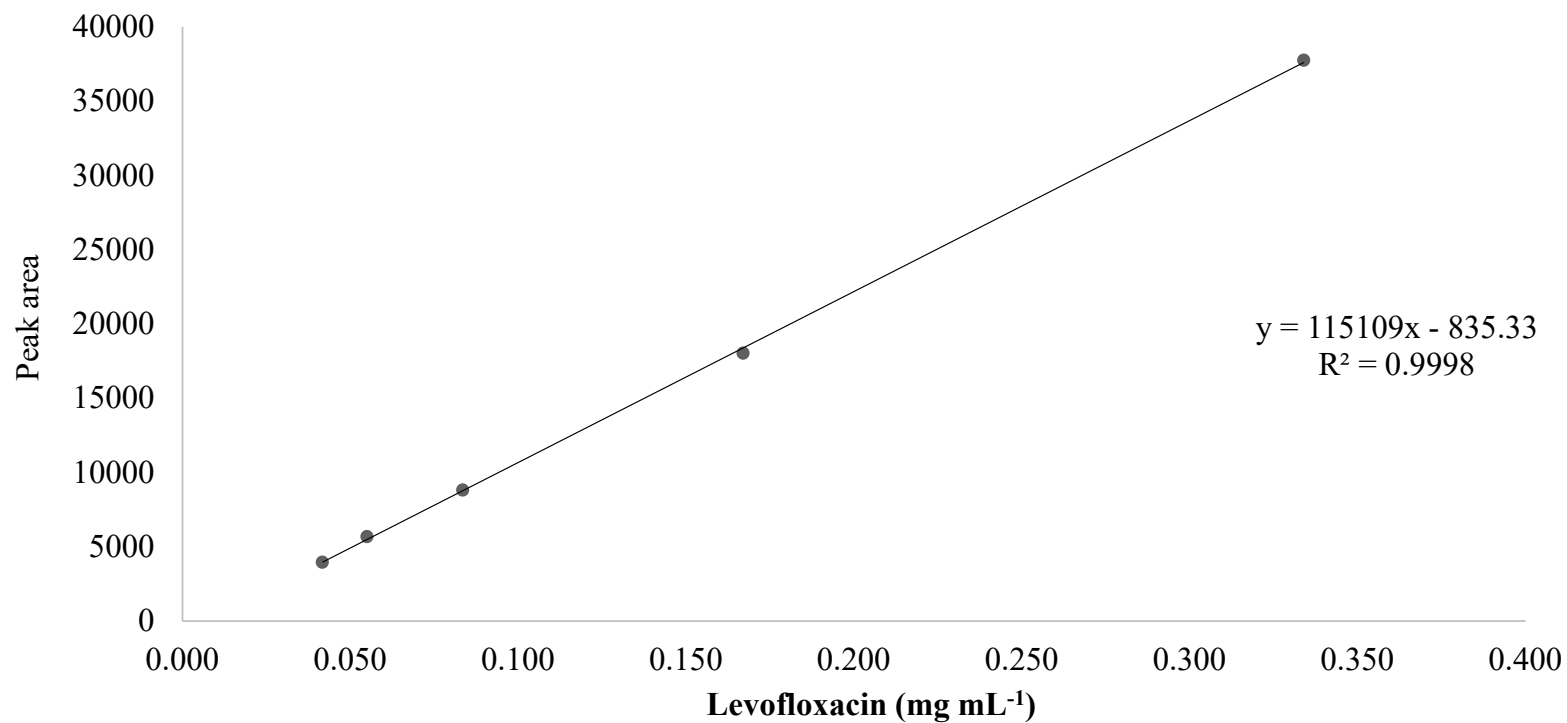

**Figure S1.** Detection of commercial levofloxacin concentration at 280 nm using HPLC and determination of levofloxacin concentration in the pharmaceutical wastewater.
